# Supplementary material for: Preparation and characterization of a series of high-energy and low-sensitivity composites with different desensitizers
Source: Royal Society of Chemistry journal article supplement (doi:10.1039/d2nj00285j), 2022-01-01
Supplement: d2nj00285j1.pdf [file d2nj00285j1.pdf]

**Supplementary Information**

**Preparation and Characterization of Series of High-Energy and Low-Sensitivity  
Composites with Different Desensitizers**

Yunqiu Li<sup>1</sup>, Bin Li<sup>1</sup>, Dan Zhang<sup>1</sup>, Lifeng Xie<sup>1\*</sup>

<sup>1</sup>*Department of Safety Engineering, School of Chemical Engineering, Nanjing*

*University of Science and Technology, Nanjing 210094, China*

---

\* Corresponding author. E-mail: [xielifeng319@sina.com](mailto:xielifeng319@sina.com)

**Table S1.** FTIR main band distribution of all the materials.

| distribution                                | CL-20 | HMX  | CL-20/HMX | CL-20/HMX/DOS    | CL-20/HMX/PVAc | CL-20/HMX/PVB | main distribution                                                  |
|---------------------------------------------|-------|------|-----------|------------------|----------------|---------------|--------------------------------------------------------------------|
|                                             | 3046  | 3035 | 3035      | 3670, 3598, 3050 | 3037           | 3674          |                                                                    |
|                                             | 3018  | 2990 | 2990      | 2933, 1738       | 1735           | 3039          | -CH <sub>2</sub> - vibration                                       |
|                                             | 1603  |      |           | 1607             | 1607           | 1611          |                                                                    |
| C-H vibration                               | 1586  | 1524 | 1527      | 1564             | 1568           | 1560          | asymmetric vibration of                                            |
|                                             | 1560  |      |           | 1450             | 1522           | 1449          | -NO <sub>2</sub>                                                   |
|                                             |       | 1460 | 1462      |                  | 1466           |               |                                                                    |
|                                             |       | 1430 | 1433      |                  |                |               |                                                                    |
|                                             |       | 1393 | 1396      | 1388             | 1394           | 1392          | -CH <sub>2</sub> - deformation                                     |
|                                             |       | 1348 | 1348      | 1317             | 1320           | 1319          |                                                                    |
|                                             |       | 1258 | 1258      | 1238             | 1270           | 1266          | N-N vibration + symmetric                                          |
|                                             |       | 1198 | 1203      | 1210             | 1240, 1209     | 1243,1208     | vibration of -NO <sub>2</sub>                                      |
|                                             |       | 1137 | 1141      | 1082             | 1087           | 1090          |                                                                    |
| asymmetric<br>vibration of -NO <sub>2</sub> |       | 1088 | 1087      | 1051             | 1049           | 1048          |                                                                    |
|                                             | 1384  |      |           | 1015             | 1010           | 1014          | N-N vibration + ring<br>vibration                                  |
|                                             | 1326  |      |           |                  |                |               |                                                                    |
|                                             | 1244  |      |           |                  |                |               |                                                                    |
|                                             | 1039  |      | 1042      |                  |                |               |                                                                    |
|                                             |       | 964  | 965       |                  |                |               | ring vibration                                                     |
|                                             | 937   | 944  | 941       | 908              | 910            | 907           |                                                                    |
| C-N vibration                               | 880   | 871  | 876       | 883              | 876            | 881           |                                                                    |
|                                             | 850   |      |           |                  |                |               | ring deformation                                                   |
|                                             | 828   | 830  | 829       | 835              | 833            | 836           |                                                                    |
|                                             | 820   |      |           |                  |                |               |                                                                    |
| C-C vibration                               | 758   | 756  | 760       | 763              | 761            | 760           |                                                                    |
|                                             | 750   |      |           | 733              | 731            | 732           |                                                                    |
|                                             | 721   |      |           | 713              | 716            | 711           | -NO <sub>2</sub> deformation                                       |
|                                             |       |      |           |                  | 678            | 672           |                                                                    |
| -NO <sub>2</sub> deformation                | 648   | 659  | 657       | 652              | 656            | 656           | ring deformation + out of<br>plane deformation of -NO <sub>2</sub> |
|                                             |       | 623  | 626       | 618              | 615            | 611           |                                                                    |
|                                             | 590   | 597  | 598       | 600              | 609            | 607           |                                                                    |

**Table S2.** Main Raman band distribution of all the materials.

| distribution                                              | CL-20            | HMX              | CL-20/HMX | CL-20/HMX/DOS | CL-20/HMX/PVAc | CL-20/HMX/PVB | main distribution                                            |
|-----------------------------------------------------------|------------------|------------------|-----------|---------------|----------------|---------------|--------------------------------------------------------------|
|                                                           | 3038.9           |                  |           | 3038.2        | 3035.4         | 3032.7        |                                                              |
| C-H stretching<br>vibration                               | 3023.1           | 3030.7<br>3017.0 | 3020.4    | 3025.2        | 3024.5         | 3025.9        | asymmetric stretching<br>vibration of -CH <sub>2</sub> -     |
|                                                           |                  | 2984.1           | 2980.7    | 2995.1        | 2997.8         | 2996.4        | symmetric stretching vibration<br>of -CH <sub>2</sub> -      |
| C-N stretching<br>vibration                               | 1620.7<br>1607.7 | 1602.9           | 1569.4    | 1602.9        | 1604.3         | 1609.8        |                                                              |
|                                                           | 1600.9           | 1563.2           | 1564.6    | 1565.3        | 1545.5         | 1550.3        | asymmetric stretching<br>vibration of -NO <sub>2</sub>       |
| asymmetric<br>stretching<br>vibration of -NO <sub>2</sub> | 1576.2<br>1555.0 |                  | 1515.4    |               |                |               |                                                              |
|                                                           | 1382.6           |                  |           | 1380.6        | 1382.6         | 1382.6        |                                                              |
|                                                           | 1334.8           | 1345.7           | 1345.7    | 1340.8        | 1353.2         | 1354.6        | N-N stretching vibration +<br>symmetric stretching vibration |
| symmetric<br>stretching<br>vibration of -NO <sub>2</sub>  | 1306.7<br>1273.2 | 1308.1           | 1182.4    | 1322.4        | 1320.4         | 1321.1        |                                                              |
|                                                           | 1258.8           |                  | 1256.8    | 1272.5        | 1275.5         | 1274.6        |                                                              |
|                                                           | 1245.1           | 1243.8           | 1246.5    | 1252.7        | 1255.4         | 1254.0        |                                                              |
|                                                           |                  | 1187.0           | 1185.6    | 1182.2        | 1189.7         | 1182.2        | ring stretching vibration                                    |
| asymmetric<br>stretching<br>vibration of C-H              | 1122.0           |                  |           | 1124.6        | 1121.3         | 1121.3        |                                                              |
|                                                           | 1085.7           |                  | 1075.5    | 1098.7        | 1091.9         | 1094.6        |                                                              |
| N-N stretching<br>vibration                               | 1043.3<br>979.7  |                  |           | 1049.5        | 1043.3         | 1045.4        |                                                              |
|                                                           |                  | 950.3            | 944.2     | 939.4         | 938.7          | 933.2         | ring stretching vibration                                    |
| -NO <sub>2</sub> deformation                              | 855.9            |                  | 880.5     | 874.4         | 875.7          | 873.0         |                                                              |
|                                                           | 832.6            | 834.0            | 832.7     | 835.4         | 834.7          | 837.5         | -NO <sub>2</sub> deformation                                 |
| ring deformation                                          | 365.4            |                  | 360.6     | 390.7         | 396.9          | 397.5         |                                                              |
|                                                           | 342.1            | 359.9            | 344.2     | 356.5         | 352.4          | 357.9         | ring deformation                                             |
| lattice vibration                                         | 319.5            |                  | 312.1     | 310.7         | 318.2          | 318.9         |                                                              |
| cage deformation                                          | 264.8            |                  | 279.9     | 280.6         | 281.9          | 280.6         |                                                              |
|                                                           | 193.7            |                  | 178.0     | 219.7         | 220.4          | 220.4         |                                                              |
| -NO <sub>2</sub> deformation                              | 127.3            | 126.7            | 126.7     | 114.4         | 113.0          | 112.9         |                                                              |

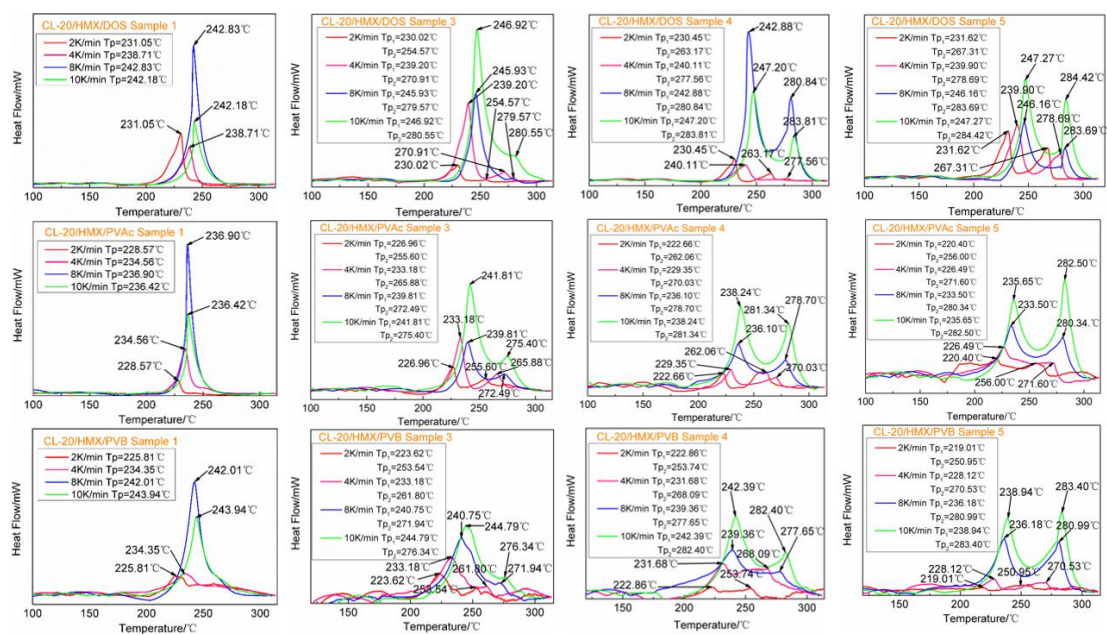

**Fig. S1.** DSC curves of CL-20/HMX/DOS composites, CL-20/HMX/PVAc composites, and CL-20/HMX/PVB composites
